# Supplementary material for: IL-7 receptor blockade blunts antigen-specific memory T cell responses and chronic inflammation in primates
Source: PubMed Central journal article supplement (PMC6203796; doi:10.1038/s41467-018-06804-y), 2018-10-26
Supplement: 41467_2018_6804_MOESM1_ESM.pdf [file 41467_2018_6804_MOESM1_ESM.pdf]

**Supplementary figures and tables**

**IL-7 receptor blockade blunts antigen-specific memory T cell responses and  
chronic inflammation in primates**

by Belarif et al.

**Supplementary Figure 1: *In vitro* functional characterization of anti-IL7R $\alpha$  mAbs.**

(A) *Left*: Representative phosphorylated STAT5 (pSTAT5) staining by flow cytometry of unstimulated baboon PBMCs or incubated 15min with 0.1ng/ml of human IL-7  $\pm$  10 $\mu$ g/ml of anti-IL7R $\alpha$  mAbs. *Right*: IL-7-induced pSTAT5 inhibition with increasing concentration of site-1/2b IgG4 mAb (blue), site-1/2b IgG1 mAb (red), site-1 IgG4 (green) mAbs, or Ig control (grey). (B) TSLP-induced CCL17 secretion (normalized to control condition without mAb) by CD1c<sup>+</sup> dendritic cells with increasing concentration of anti-IL7R $\alpha$  mAbs (same colors as in (A)) or anti-TSLPR mAb (black). (C) *Left*: Specific cytotoxicity (%) induced by anti-IL7R $\alpha$  mAbs (same colors as in (A)) on transfected IL-7R $\alpha$ <sup>+</sup> Ba/F3 cell line cultured 4 hours with NK cells (ratio 1:10). *Right*: Specific cytotoxicity (%) induced with increasing concentration of site-1/2b IgG1 on human T cell leukemia expressing high level of CD127 (DND-41 cell line, solid red line) or low level of CD127 (Jurkat cell line, dotted red line) cultured 4 hours with NK cells (ratio 1:10). Data are mean  $\pm$  SEM.

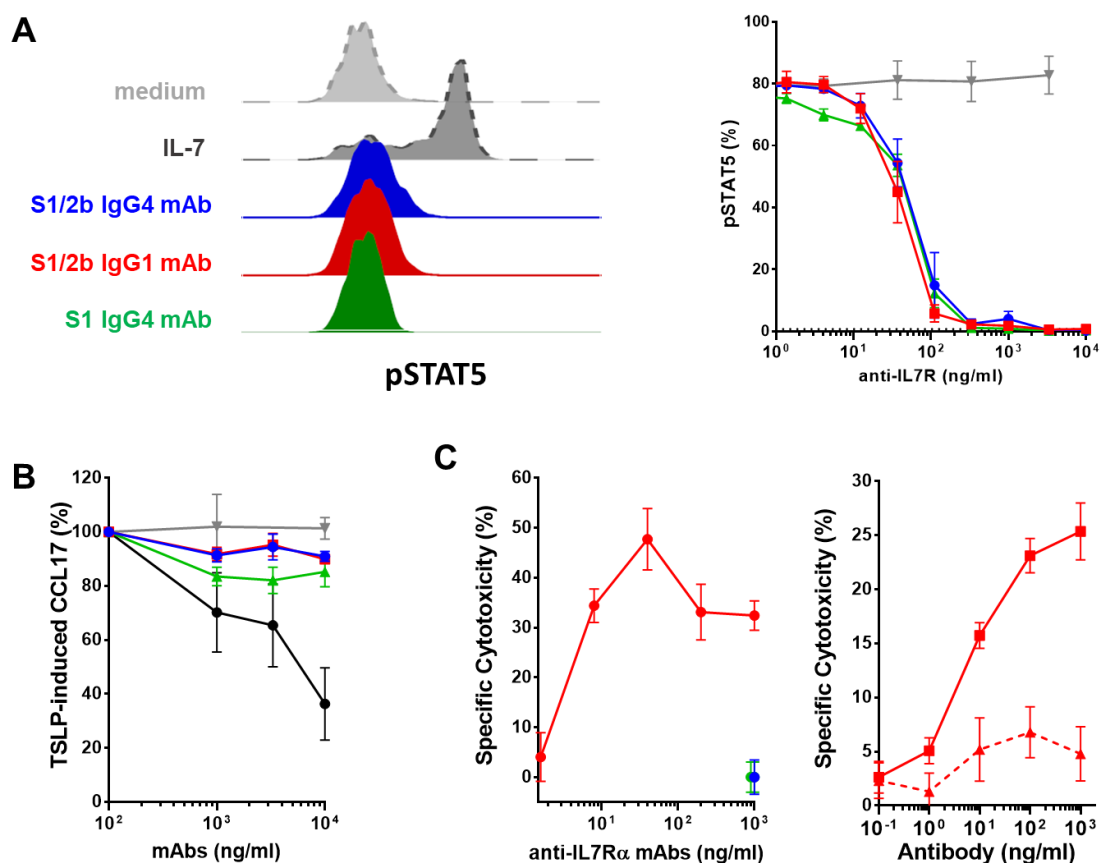

**Supplementary Figure 2: Pharmacological evaluation following intravenous administration of anti-IL7R $\alpha$  mAbs in baboons.**

(A) Total CD127 expression represented by the Mean Fluorescence Intensity (MFI) measured by flow cytometry on peripheral blood CD3<sup>+</sup> baboon T lymphocytes after a single intravenous injection of 10mg/kg of the site-1/2b IgG1 mAb (red, n = 3), site-1/2b IgG4 mAb (blue, n = 3) or site-1 IgG4 mAb (green, n = 3). Dotted line represents the mean basal level of expression before administration of mAbs. (B) Serum concentration of anti-IL7R $\alpha$  mAbs after injection in same animals as in (A). (C) CD127 receptor occupancy determined by flow cytometry on peripheral CD3<sup>+</sup> T lymphocytes purified from the blood (*left*) or lymph nodes (*right*) of the same animals as in (A). Data are mean  $\pm$  SEM.

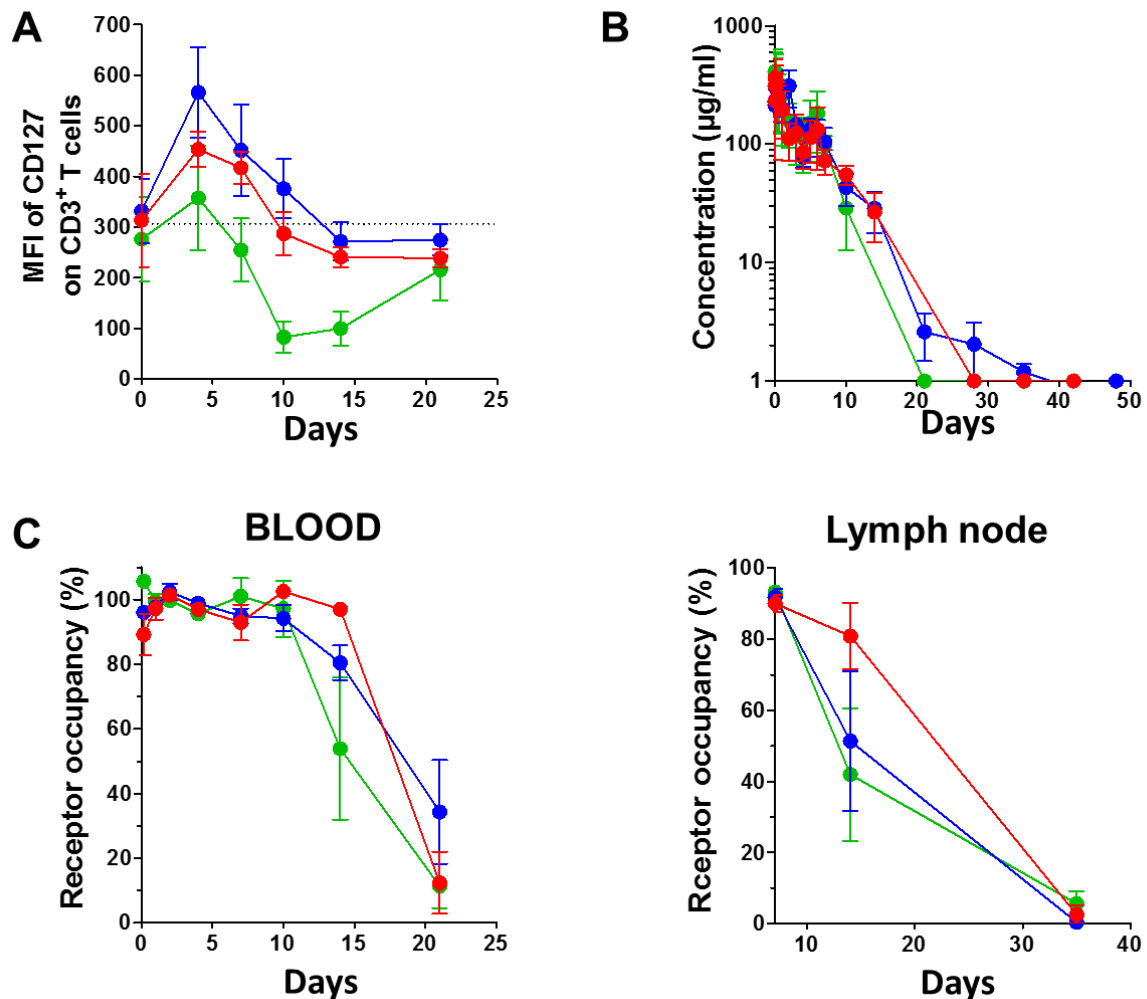

**Supplementary Figure 3: Sheep red blood cell (SRBC) immunization.**

(A) Anti-SRBC IgG fold-change serum titers in baboons treated with a single intravenous injection of 10mg/kg of the site-1/2b IgG1 mAb (red, n = 3), site-1/2b IgG4 mAb (blue, n = 3) or site-1 IgG4 mAb (green, n = 3), and challenged 24 hours later with intravenous injection of 1.5ml/kg of SRBC at 10%. Historical placebo-treated animals (black, n = 3) following the same protocol were used as controls <sup>50</sup>. (B) Same as in (A) after secondary SRBC challenge performed 20 weeks following anti-IL7R $\alpha$  mAb administration. Data are mean  $\pm$  SEM. \* p<0.05 one-way ANOVA and Dunn's test comparison between the site1/2b IgG4 mAb and control group at 2 weeks post-SRBC challenge.

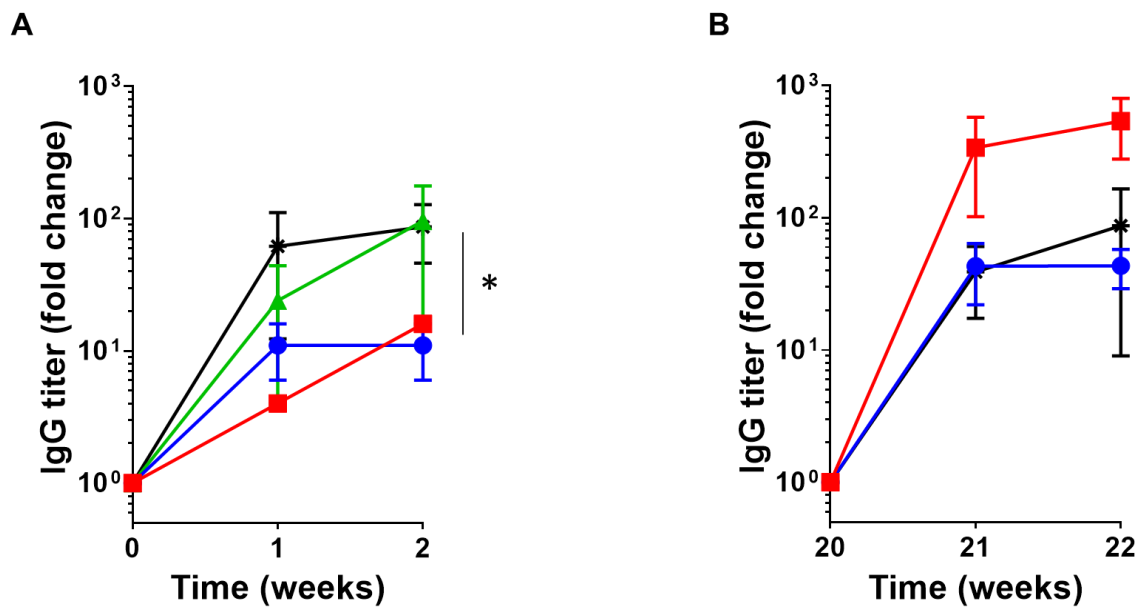

**Supplementary Figure 4: Anti-IL-7R $\alpha$  mAbs in primates do not induce modification of peripheral blood cells.**

Peripheral blood immune cell enumeration and T cell subset frequency determined by flow cytometry for baboons treated with a single intravenous injection of 10mg/kg of the site-1/2b IgG1 mAb (red, n= 3), site-1/2b IgG4 mAb (blue, n = 3) or site-1 IgG4 mAb (green, n = 3). T cell sub-populations were defined using the following gating strategy CD3<sup>+</sup> CD4<sup>+</sup> or CD8<sup>+</sup> cells for Tem: effector memory T cells (CD95<sup>+</sup> CD28<sup>-</sup>), Tcm: central memory T cells (CD95<sup>+</sup> CD28<sup>+</sup>), Tn: naïve T cells (CD95<sup>-</sup> CD28<sup>+</sup>), Tregs: regulatory T cells (CD4<sup>+</sup> CD25<sup>high</sup> Foxp3<sup>+</sup>) as previously described <sup>76</sup>. Data are mean  $\pm$  SEM of the indicated population.

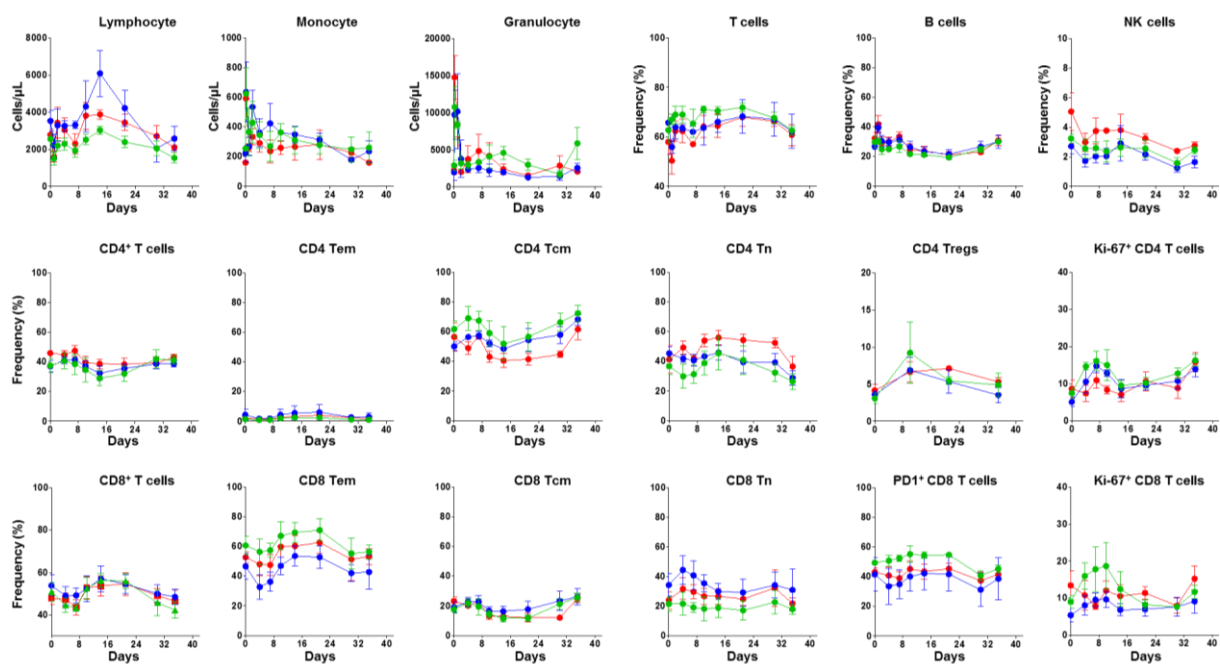

**Supplementary Figure 5: Anti-IL7R $\alpha$  mAb administration does not induce significant peripheral cytokine release.**

Serum concentration (pg/mL) of indicated cytokines (IL-2, IL-4, IL-5, IL-6, TNF $\alpha$  and INF $\gamma$ ) in baboons after a single intravenous injection of 10mg/kg of the site-1/2b IgG1 mAb (red, n= 3), site-1/2b IgG4 mAb (blue, n = 3) or site-1 IgG4 mAb (green, n = 3). Data are mean  $\pm$  SEM.

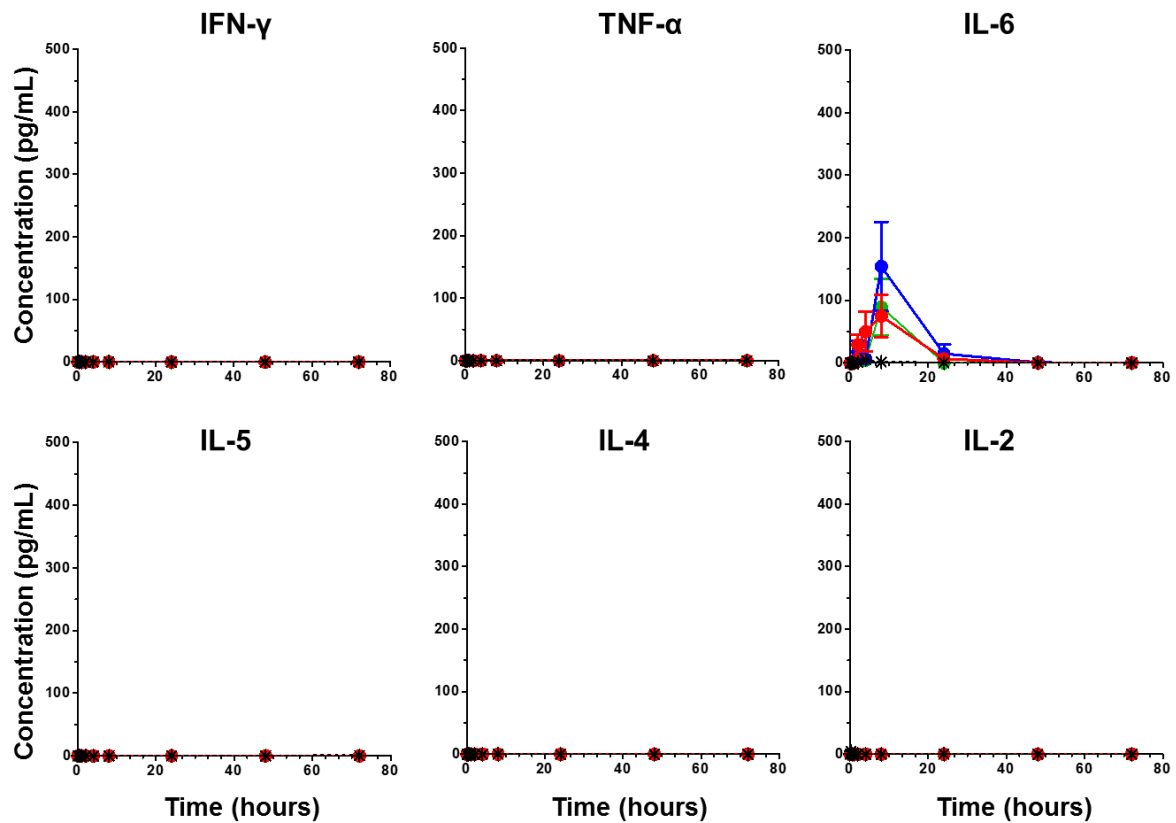

**Supplementary Figure 6: Comparison of anti-IL-7R $\alpha$  site-1 and site1/2b mAbs agonist signals on human cell by western blot.**

Raw data of the representative phospho-STAT5, phospho-PI3k-p55, phospho-ERK1/2 and GAPDH western blot of one out of seven representative human donor cells illustrated in Figure 3C. PBMCs were pretreated with 10 $\mu$ g/mL of one anti-IL-7R $\alpha$  mAb and then incubated for 10 min at 37 $^{\circ}$ C with or without 5ng/ml of human IL-7.

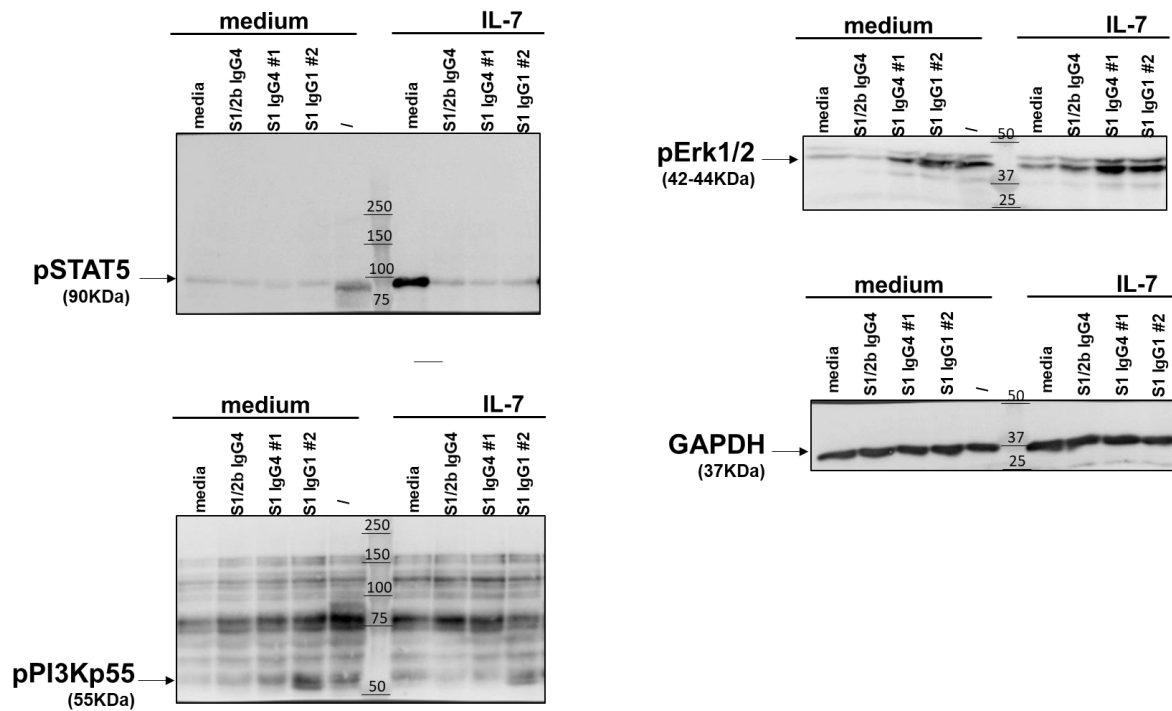

**Supplementary Figure 7: Comparison of anti-IL-7R $\alpha$  site-1 and site1/2b mAbs agonist signals on human and baboon PBMC.**

Phospho-STAT5, phospho-PI3k-p55, phospho-ERK1/2 and GAPDH western blot on human (A) or baboon cells (B). PBMCs were pretreated with 10 $\mu$ g/mL of anti-IL-7R $\alpha$  mAbs (Site 1/2b IgG4, Site 1/2b IgG1, Site 1 IgG4 #1, Site 1 IgG1 #1, Site 1 IgG1 #2 and Site 1 IgG4 #3) or human isotype control (Iso hIgG4 and Iso hIgG1) and then incubated for 10 min at 37°C before protein lysates analysis.

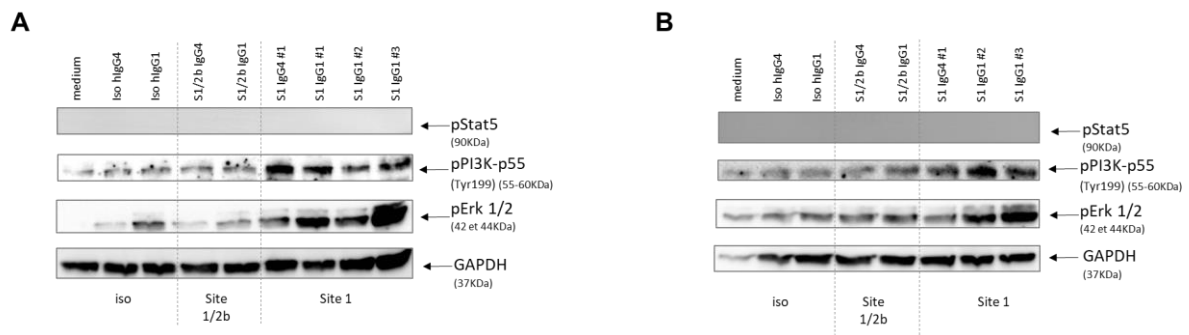



**Supplementary Figure 8: Gene Ontology (GO) identified in the signature for each anti-IL-7R $\alpha$  mAb (blue: site-1/2b IgG4, red: site-1 IgG4#1, green: site-1 IgG1#2) versus control. Circle size is proportional to the number of genes for each category.**

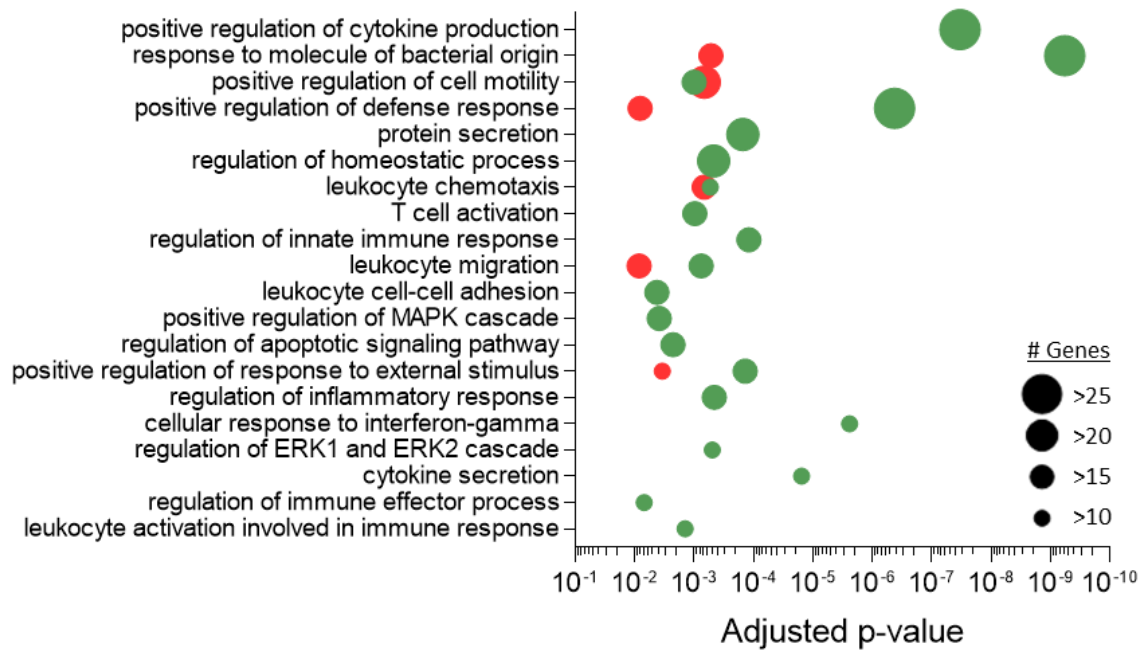

**Supplementary Figure 9: GoMiner gene ontology enrichment of the three clusters identified for the 93 most differentially expressed genes (FDR 5%, FC > 2) between IL-7 stimulation and control medium condition.**

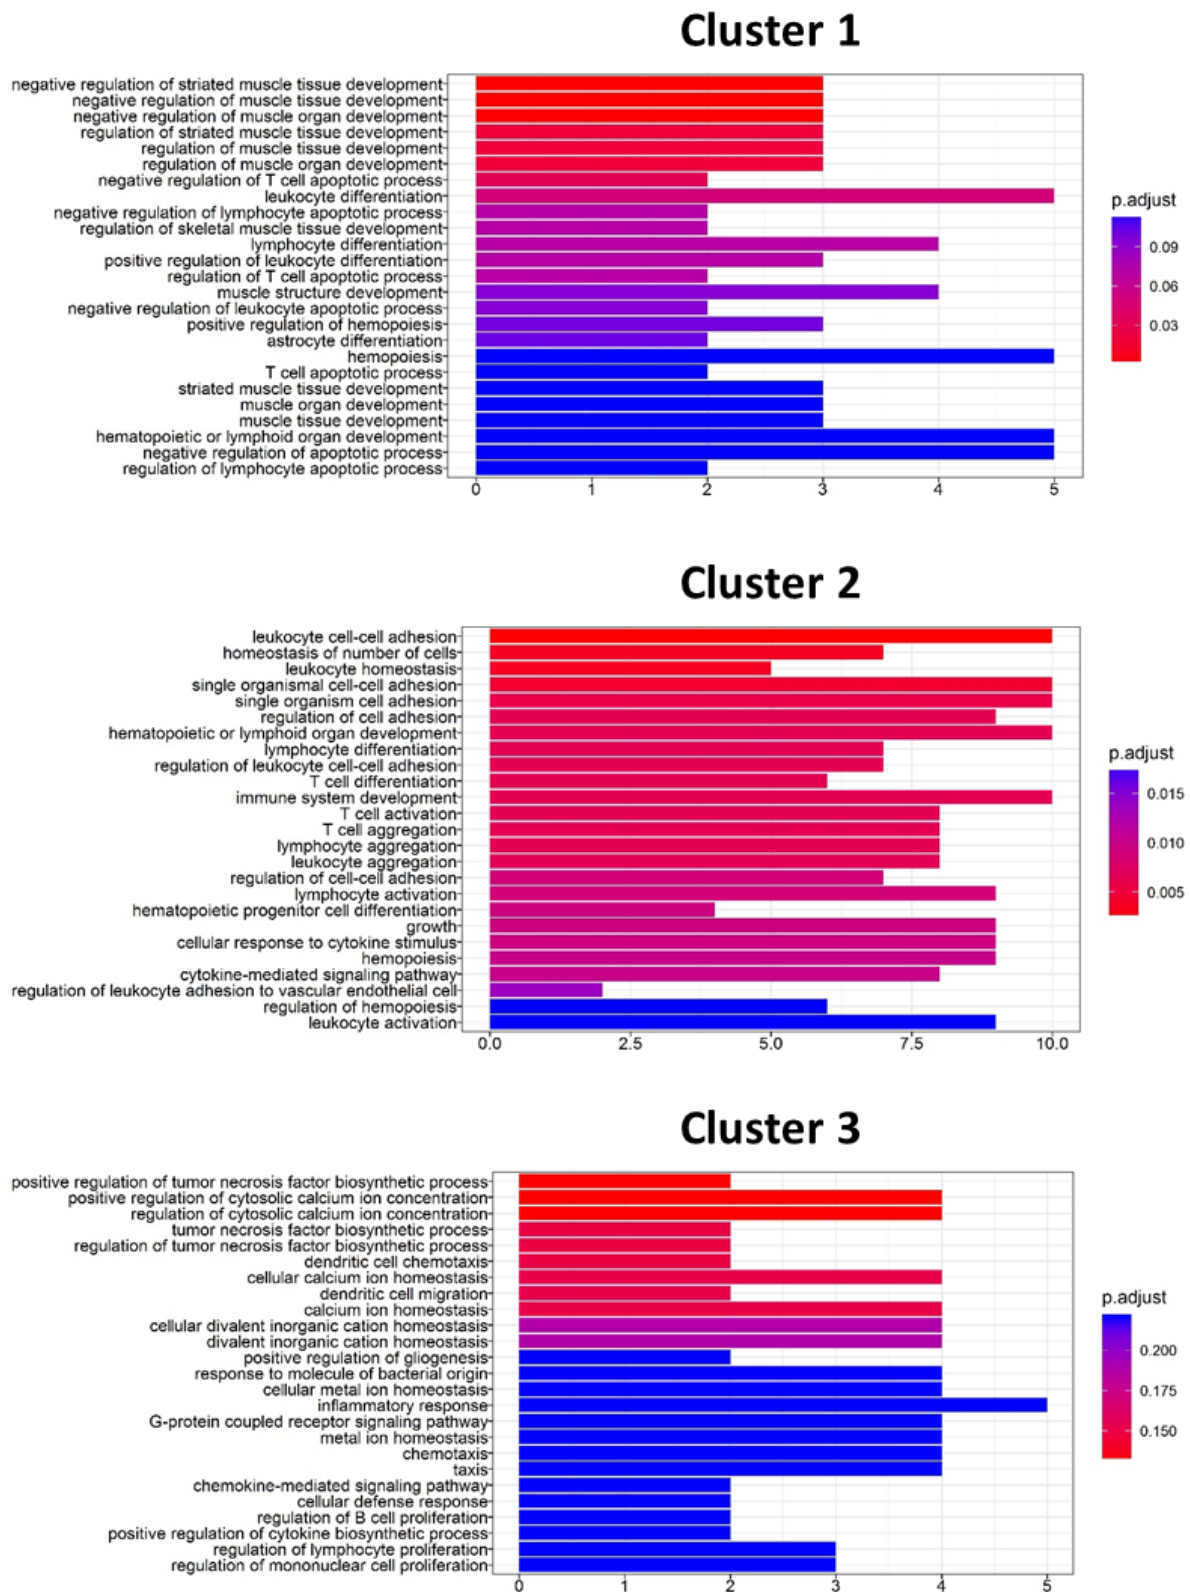

**Supplementary Figure 10: IKZF4 gene expression.**

IKZF4 mRNA expression confirmed by RT-qPCR on human PBMC cultured for 3.5 hours with (empty round) or without (full symbols) 5 ng/ml of IL-7 and 10  $\mu$ g/ml of anti-human IL-7R $\alpha$  mAbs (blue: site-1/2b IgG4, red: site-1 IgG4#1, green: site-1 IgG1#2). Data were normalized to basal expression in the absence of IL-7 and mAbs. \*  $p < 0.05$  between indicated groups.

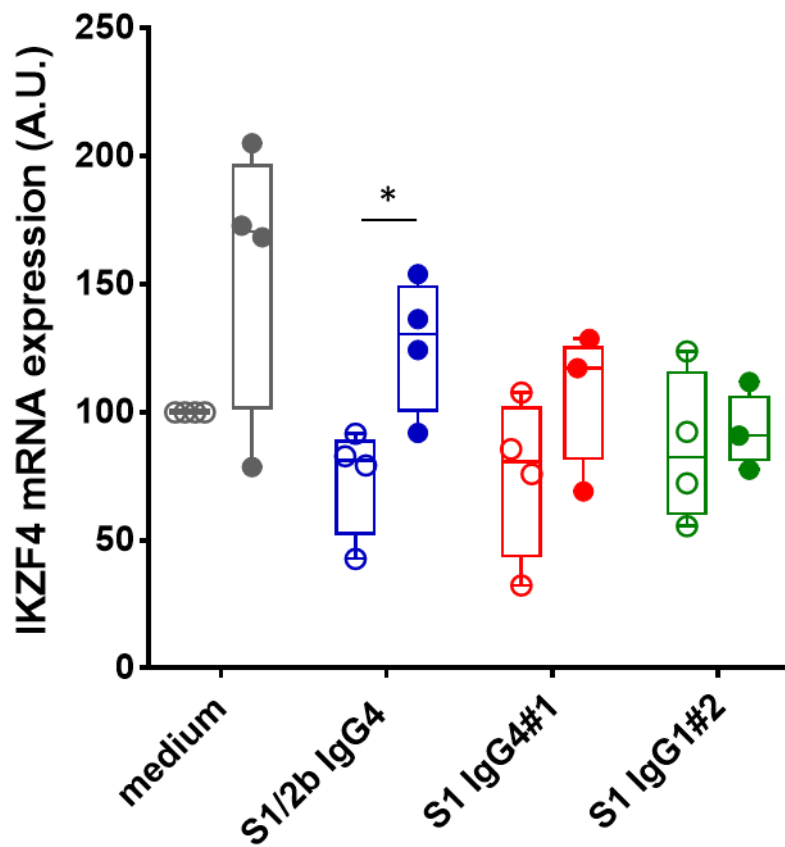

**Supplementary Figure 11: Erythema and Elispot response in the non-responder animal.**

Cutaneous erythema response (black histograms, *left-axis*) at indicated time-points, represented with area under the curve (AUC) of daily erythema diameters, after tuberculin intradermal injection in the non-responder baboon (1 out of 10) treated with a single intravenous injection of 10mg/Kg of the humanized site-1/2b IgG4 mAb. IFN- $\gamma$ -secreting cell frequencies (white histograms, *right-axis*) in PBMCs of the same animal after *ex-vivo* tuberculin restimulation at the indicated time-point.

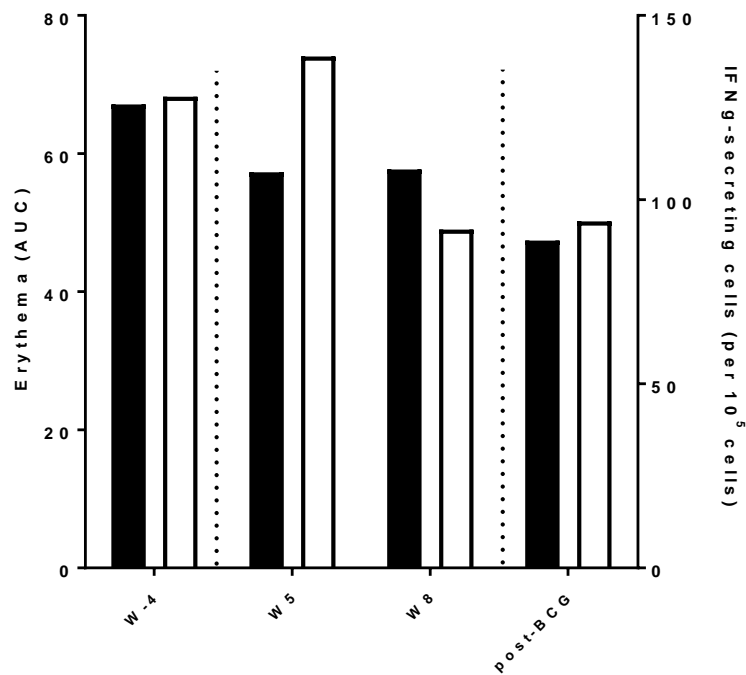

**Supplementary Figure 12: CD25 and C69 expression on baboon CD3<sup>+</sup> T cells population before and after stimulation.**

Representative expression of CD25 and CD69 analyzed by flow cytometry on peripheral blood T-cell (CD3<sup>+</sup>) at the indicated time-point after treatment with a single intravenous injection of 10 mg/kg of a humanized site-1/2b IgG4 mAb. CD25 and CD69 expression was analyzed on T cells in unstimulated or after 48 hours of anti-CD3 polyclonal stimulation.

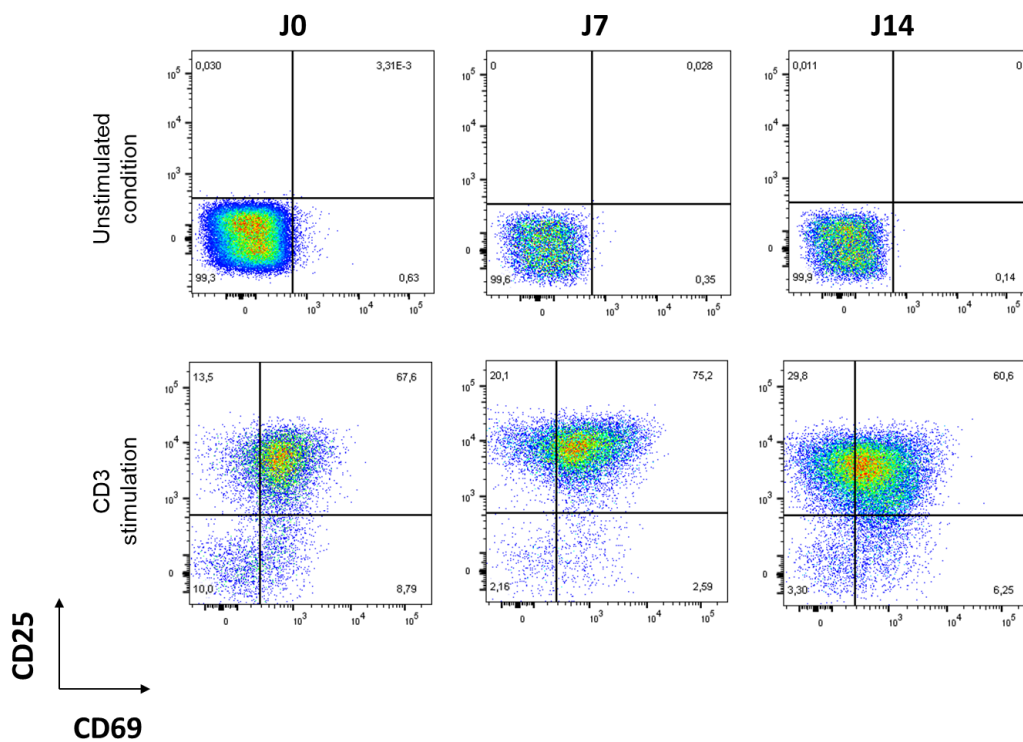

**Supplementary Table 1: List of genes significantly (FDR 5%) and differentially (fold-change >1.5) expressed after incubation of human PBMCs (n=7) with anti-IL7R $\alpha$  mAbs compared to unstimulated cells.**

| Gene     | Site 1/2b IgG4                         |              |   | Site 1 IgG4 #1                         |              |   | Site 1 IgG1 #2                         |              |   | EMC8  |       |       | FAM115C |   |       |       |   |
|----------|----------------------------------------|--------------|---|----------------------------------------|--------------|---|----------------------------------------|--------------|---|-------|-------|-------|---------|---|-------|-------|---|
|          | log <sub>2</sub> (U/instim. adj.P.Val) | Differential |   | log <sub>2</sub> (U/instim. adj.P.Val) | Differential |   | log <sub>2</sub> (U/instim. adj.P.Val) | Differential |   | 0.61  | 0.229 | 1.15  | 0.004   | * | 1.04  | 0.008 | * |
| ACADVL   | 0.85                                   | 0.040        | * | 1.15                                   | 0.001        | * | 0.87                                   | 0.011        | * | 0.37  | 0.264 | 0.61  | 0.022   | * | 0.64  | 0.013 | * |
| AHR      | 0.86                                   | 0.029        | * | 1.16                                   | 0.000        | * | 1.21                                   | 0.000        | * | -0.35 | 0.234 | -0.59 | 0.011   | * | -0.66 | 0.004 | * |
| AKIRIN1  | 0.75                                   | 0.028        | * | 0.88                                   | 0.002        | * | 0.78                                   | 0.006        | * | -0.48 | 0.188 | -0.67 | 0.023   | * | -0.85 | 0.003 | * |
| ALDH16A1 | 1.23                                   | 0.021        | * | 1.45                                   | 0.001        | * | 1.32                                   | 0.003        | * | 0.55  | 0.076 | 0.78  | 0.002   | * | 0.70  | 0.005 | * |
| ALDH5A1  | 0.72                                   | 0.044        | * | 0.93                                   | 0.002        | * | 1.05                                   | 0.001        | * | 0.82  | 0.073 | 0.92  | 0.016   | * | 0.95  | 0.010 | * |
| APPBP2   | 0.81                                   | 0.001        | * | 0.90                                   | 0.000        | * | 0.81                                   | 0.000        | * | 0.70  | 0.087 | 1.05  | 0.002   | * | 0.80  | 0.014 | * |
| ARHGAP1  | 0.85                                   | 0.001        | * | 1.05                                   | 0.000        | * | 0.88                                   | 0.000        | * | 0.43  | 0.280 | 0.74  | 0.019   | * | 0.74  | 0.017 | * |
| B3GNT2   | 1.03                                   | 0.034        | * | 1.23                                   | 0.003        | * | 1.15                                   | 0.005        | * | 0.97  | 0.056 | 1.05  | 0.014   | * | 0.84  | 0.047 | * |
| C17orf59 | 1.07                                   | 0.039        | * | 1.49                                   | 0.001        | * | 1.27                                   | 0.004        | * | 0.42  | 0.287 | 0.77  | 0.013   | * | 0.77  | 0.010 | * |
| CDC117   | 0.77                                   | 0.024        | * | 0.88                                   | 0.002        | * | 0.80                                   | 0.005        | * | 0.54  | 0.088 | 0.61  | 0.019   | * | 0.59  | 0.022 | * |
| CCNI     | 0.73                                   | 0.004        | * | 0.98                                   | 0.000        | * | 0.78                                   | 0.001        | * | 0.58  | 0.165 | 0.74  | 0.028   | * | 0.90  | 0.006 | * |
| CDK17    | 0.98                                   | 0.003        | * | 1.09                                   | 0.000        | * | 0.94                                   | 0.001        | * | 0.38  | 0.344 | 0.86  | 0.005   | * | 0.67  | 0.028 | * |
| COTL1    | 1.67                                   | 0.000        | * | 1.80                                   | 0.000        | * | 1.35                                   | 0.000        | * | 0.63  | 0.116 | 0.81  | 0.013   | * | 0.96  | 0.042 | * |
| CYP11B1  | -0.66                                  | 0.029        | * | -0.75                                  | 0.003        | * | -0.69                                  | 0.006        | * | 0.54  | 0.149 | 0.71  | 0.019   | * | 0.62  | 0.040 | * |
| DDI2     | 1.17                                   | 0.011        | * | 1.45                                   | 0.000        | * | 1.24                                   | 0.002        | * | 0.45  | 0.248 | 0.92  | 0.003   | * | 0.82  | 0.007 | * |
| DEF6     | 1.03                                   | 0.030        | * | 1.39                                   | 0.001        | * | 1.09                                   | 0.006        | * | 0.86  | 0.161 | 1.54  | 0.002   | * | 1.38  | 0.005 | * |
| DNIL2    | 1.17                                   | 0.029        | * | 1.19                                   | 0.008        | * | 1.22                                   | 0.006        | * | 0.54  | 0.249 | 0.81  | 0.029   | * | 1.19  | 0.001 | * |
| DUSP2    | 1.73                                   | 0.002        | * | 2.18                                   | 0.000        | * | 2.30                                   | 0.000        | * | 0.49  | 0.263 | 0.77  | 0.030   | * | 1.70  | 0.044 | * |
| ENG      | -0.73                                  | 0.004        | * | -0.61                                  | 0.005        | * | -0.67                                  | 0.002        | * | 1.05  | 0.089 | -1.24 | 0.015   | * | -1.06 | 0.036 | * |
| EXOC2    | 0.69                                   | 0.043        | * | 0.52                                   | 0.033        | * | 0.63                                   | 0.016        | * | 0.89  | 0.112 | 0.93  | 0.047   | * | 0.75  | 0.006 | * |
| FAM160B1 | 0.83                                   | 0.030        | * | 1.26                                   | 0.000        | * | 0.72                                   | 0.024        | * | 0.69  | 0.150 | 1.05  | 0.007   | * | 0.90  | 0.017 | * |
| FEM1B    | 0.99                                   | 0.005        | * | 1.09                                   | 0.000        | * | 0.87                                   | 0.005        | * | -0.32 | 0.298 | -0.61 | 0.013   | * | -0.61 | 0.010 | * |
| GCF2     | 1.00                                   | 0.011        | * | 0.87                                   | 0.011        | * | 0.83                                   | 0.013        | * | 0.20  | 0.700 | 0.79  | 0.021   | * | 0.83  | 0.012 | * |
| GNAS1    | 0.99                                   | 0.011        | * | 1.14                                   | 0.001        | * | 1.25                                   | 0.000        | * | 0.52  | 0.086 | 0.97  | 0.000   | * | 0.79  | 0.002 | * |
| GOPC     | 0.83                                   | 0.015        | * | 0.64                                   | 0.029        | * | 0.69                                   | 0.015        | * | 0.41  | 0.212 | 0.52  | 0.018   | * | 0.61  | 0.017 | * |
| GRIFF1   | 0.65                                   | 0.015        | * | 0.81                                   | 0.000        | * | 0.69                                   | 0.002        | * | 0.65  | 0.089 | -0.73 | 0.022   | * | -0.62 | 0.028 | * |
| HIPK3    | 0.67                                   | 0.025        | * | 0.79                                   | 0.002        | * | 0.69                                   | 0.006        | * | 0.74  | 0.067 | 0.92  | 0.006   | * | 0.72  | 0.028 | * |
| HMHA1    | 0.88                                   | 0.004        | * | 1.05                                   | 0.000        | * | 0.89                                   | 0.001        | * | 0.22  | 0.633 | 0.63  | 0.046   | * | 0.69  | 0.022 | * |
| HSPB11   | 1.04                                   | 0.029        | * | 0.97                                   | 0.017        | * | 0.86                                   | 0.030        | * | 0.58  | 0.173 | 0.80  | 0.020   | * | 0.74  | 0.028 | * |
| JUNB     | 0.91                                   | 0.025        | * | 1.25                                   | 0.000        | * | 1.42                                   | 0.000        | * | 0.56  | 0.095 | 0.67  | 0.016   | * | 0.66  | 0.014 | * |
| KLC2     | 1.08                                   | 0.036        | * | 1.18                                   | 0.007        | * | 1.34                                   | 0.002        | * | 0.60  | 0.077 | 0.69  | 0.016   | * | 0.69  | 0.012 | * |
| LYSMD2   | 0.78                                   | 0.016        | * | 0.72                                   | 0.010        | * | 0.70                                   | 0.009        | * | 0.39  | 0.408 | -1.89 | 0.049   | * | -1.41 | 0.008 | * |
| LYZ      | -0.60                                  | 0.031        | * | -0.86                                  | 0.000        | * | -0.76                                  | 0.001        | * | 1.02  | 0.125 | 1.19  | 0.049   | * | 1.15  | 0.009 | * |
| MS4A7    | -0.80                                  | 0.001        | * | -0.98                                  | 0.000        | * | -0.59                                  | 0.006        | * | 0.84  | 0.031 | 0.84  | 0.031   | * | 1.00  | 0.008 | * |
| MTA2     | 0.84                                   | 0.038        | * | 1.18                                   | 0.001        | * | 1.10                                   | 0.002        | * | 0.39  | 0.408 | 0.77  | 0.032   | * | 1.13  | 0.002 | * |
| NCOA5    | 0.65                                   | 0.018        | * | 0.84                                   | 0.000        | * | 0.89                                   | 0.000        | * | 0.44  | 0.204 | 0.69  | 0.012   | * | 0.72  | 0.007 | * |
| NSUN2    | 0.63                                   | 0.029        | * | 0.74                                   | 0.002        | * | 0.75                                   | 0.002        | * | -0.01 | 0.992 | 0.71  | 0.021   | * | 0.74  | 0.013 | * |
| PITH1    | 0.81                                   | 0.040        | * | 1.03                                   | 0.002        | * | 0.81                                   | 0.013        | * | 0.51  | 0.283 | 0.75  | 0.047   | * | 0.83  | 0.024 | * |
| PLEKHF2  | 0.72                                   | 0.004        | * | 0.83                                   | 0.000        | * | 0.77                                   | 0.001        | * | 0.24  | 0.595 | 0.76  | 0.014   | * | 0.66  | 0.030 | * |
| POLR1MT  | 1.09                                   | 0.001        | * | 1.30                                   | 0.000        | * | 1.06                                   | 0.000        | * | 0.66  | 0.068 | 0.63  | 0.040   | * | 0.99  | 0.001 | * |
| PPP2CA   | 0.75                                   | 0.025        | * | 0.87                                   | 0.002        | * | 0.75                                   | 0.007        | * | 0.96  | 0.180 | 1.17  | 0.044   | * | 1.22  | 0.031 | * |
| PREB     | 0.88                                   | 0.018        | * | 0.78                                   | 0.014        | * | 0.92                                   | 0.004        | * | 0.96  | 0.180 | -0.53 | 0.102   | * | -0.62 | 0.017 | * |
| PRKCH    | 0.70                                   | 0.011        | * | 0.88                                   | 0.000        | * | 0.78                                   | 0.001        | * | 0.68  | 0.096 | 0.77  | 0.024   | * | 0.98  | 0.003 | * |
| PSMD3    | 1.01                                   | 0.035        | * | 1.58                                   | 0.000        | * | 1.37                                   | 0.001        | * | 0.95  | 0.092 | 1.23  | 0.008   | * | 1.22  | 0.007 | * |
| PYGO2    | 1.08                                   | 0.003        | * | 1.07                                   | 0.001        | * | 0.74                                   | 0.016        | * | 0.79  | 0.069 | 1.15  | 0.001   | * | 1.15  | 0.002 | * |
| RAG5     | 0.63                                   | 0.004        | * | 0.67                                   | 0.000        | * | 0.60                                   | 0.002        | * | 0.51  | 0.208 | 0.72  | 0.026   | * | 0.82  | 0.009 | * |
| RBL2     | 0.71                                   | 0.011        | * | 0.85                                   | 0.000        | * | 0.59                                   | 0.012        | * | 0.23  | 0.751 | 0.97  | 0.034   | * | 1.15  | 0.009 | * |
| RRP1     | 0.69                                   | 0.019        | * | 0.62                                   | 0.013        | * | 0.80                                   | 0.002        | * | 0.66  | 0.052 | 0.78  | 0.006   | * | 0.67  | 0.016 | * |
| SMCHD1   | 0.71                                   | 0.001        | * | 1.00                                   | 0.000        | * | 0.85                                   | 0.000        | * | 0.47  | 0.137 | 0.65  | 0.011   | * | 0.61  | 0.014 | * |
| SREBF2   | 0.83                                   | 0.009        | * | 1.13                                   | 0.000        | * | 0.98                                   | 0.000        | * | 0.91  | 0.076 | 1.22  | 0.004   | * | 1.17  | 0.005 | * |
| TAF11    | 1.87                                   | 0.001        | * | 1.57                                   | 0.001        | * | 1.28                                   | 0.006        | * | 0.64  | 0.145 | 0.90  | 0.012   | * | 0.72  | 0.044 | * |
| TAF4B    | 0.75                                   | 0.030        | * | 1.12                                   | 0.000        | * | 1.29                                   | 0.000        | * | 0.50  | 0.145 | 0.82  | 0.003   | * | 0.76  | 0.005 | * |
| TMA4     | 1.04                                   | 0.009        | * | 1.13                                   | 0.001        | * | 0.89                                   | 0.009        | * | 0.56  | 0.054 | 0.71  | 0.003   | * | 0.64  | 0.007 | * |
| TPOX1    | 2.55                                   | 0.008        | * | 2.96                                   | 0.000        | * | 2.06                                   | 0.011        | * | 0.47  | 0.242 | 0.85  | 0.007   | * | 0.65  | 0.038 | * |
| TRAM1    | 0.71                                   | 0.001        | * | 0.73                                   | 0.000        | * | 0.59                                   | 0.002        | * | 0.51  | 0.220 | 0.86  | 0.008   | * | 0.83  | 0.009 | * |
| TRPC4AP  | 0.98                                   | 0.005        | * | 1.21                                   | 0.000        | * | 1.06                                   | 0.001        | * | 0.80  | 0.061 | 1.09  | 0.002   | * | 0.75  | 0.033 | * |
| TTCL3    | 0.76                                   | 0.034        | * | 0.90                                   | 0.003        | * | 0.68                                   | 0.022        | * | -0.43 | 0.034 | -0.49 | 0.005   | * | -0.63 | 0.000 | * |
| UNC119   | 1.02                                   | 0.036        | * | 1.43                                   | 0.001        | * | 1.26                                   | 0.002        | * | -0.45 | 0.041 | -0.43 | 0.022   | * | -0.61 | 0.001 | * |
| USP9K    | 0.90                                   | 0.000        | * | 0.92                                   | 0.000        | * | 0.85                                   | 0.000        | * | -0.56 | 0.040 | -0.61 | 0.008   | * | -0.48 | 0.036 | * |
| VP54A    | 0.74                                   | 0.042        | * | 0.95                                   | 0.002        | * | 0.75                                   | 0.012        | * | 0.64  | 0.028 | 0.64  | 0.001   | * | 0.55  | 0.004 | * |
| ZNF800   | 0.74                                   | 0.013        | * | 1.01                                   | 0.000        | * | 0.84                                   | 0.001        | * | -0.49 | 0.004 | -0.62 | 0.004   | * | -0.35 | 0.013 | * |
| ACTN4    | 0.55                                   | 0.005        | * | 0.60                                   | 0.000        | * | 0.65                                   | 0.000        | * | -0.36 | 0.046 | -0.38 | 0.013   | * | -0.75 | 0.000 | * |
| C15orf48 | -0.63                                  | 0.029        | * | -0.87                                  | 0.000        | * | -0.51                                  | 0.035        | * | 0.49  | 0.040 | 0.74  | 0.000   | * | 0.49  | 0.013 | * |
| C3AR1    | -0.56                                  | 0.011        | * | -0.75                                  | 0.000        | * | -0.64                                  | 0.001        | * | -0.52 | 0.040 | -0.66 | 0.002   | * | -0.42 | 0.051 | * |
| CD247    | 0.80                                   | 0.004        | * | 0.87                                   | 0.000        | * | 0.50                                   | 0.038        | * | 0.49  | 0.040 | 0.74  | 0.000   | * | 0.49  | 0.013 | * |
| FAM50A   | 0.66                                   | 0.028        | * | 0.93                                   | 0.000        | * | 0.54                                   | 0.031        | * | -0.52 | 0.040 | -0.66 | 0.002   | * | -0.42 | 0.051 | * |
| HCK      | -0.65                                  | 0.009        | * | -0.83                                  | 0.000        | * | -0.46                                  | 0.030        | * | 0.49  | 0.040 | 0.74  | 0.000   | * | 0.49  | 0.013 | * |
| IL6ST    | 0.43                                   | 0.034        | * | 0.60                                   | 0.000        | * | 0.77                                   | 0.000        | * | -0.52 | 0.040 | -0.66 | 0.002   | * | -0.42 | 0.051 | * |
| JAK1     | 0.71                                   | 0.001        | * | 0.80                                   | 0.000        | * | 0.58                                   | 0.002        | * | 0.49  | 0.040 | 0.74  | 0.000   | * | 0.49  | 0.013 | * |
| KYNU     | -0.60                                  | 0.018        | * | -0.94                                  | 0.000        | * | -0.56                                  | 0.007        | * | -0.52 | 0.040 | -0.66 | 0.002   | * | -0.42 | 0.051 | * |
| NCF2     | -0.57                                  | 0.029        | * | -0.71                                  | 0.001        | * | -0.70                                  | 0.001        | * | -0.55 | 0.034 | -0.60 | 0.006   | * | -0.38 | 0.091 | * |
| PAPF10   | 0.58                                   | 0.037        | * | 0.75                                   | 0.002        | * | 0.73                                   | 0.002        | * | -0.48 | 0.034 | -0.60 | 0.002   | * | -0.36 | 0.846 | * |
| RAD51L2  | 0.61                                   | 0.037        | * | 0.66                                   | 0.008        | * | 0.53                                   | 0.033        | * | 0.49  | 0.040 | 0.74  | 0.000   | * | 0.49  | 0.013 | * |
| SMG5     | 0.54                                   | 0.033        | * | 0.80                                   | 0.000        | * | 0.75                                   | 0.001        | * | -0.52 | 0.040 | -0.66 | 0.002   | * | -0.42 | 0.051 | * |
| TOR3A    | 0.73                                   | 0.028        | * | 0.62                                   | 0.028        | * | 0.57                                   | 0.040        | * | 0.49  | 0.040 | 0.74  | 0.000   | * | 0.49  | 0.013 | * |
| ADM      | -0.88                                  | 0.005        | * | -1.01                                  | 0.000        | * | -0.02                                  | 0.967        | * | -0.52 | 0.040 | -0.66 | 0.002   | * | -0.42 | 0.051 | * |
| CES1     | -0.77                                  | 0.028        | * | -0.78                                  | 0.008        | * | -0.45                                  | 0.145        | * | 0.49  | 0.040 | 0.74  | 0.000   | * | 0.49  | 0.013 | * |
| SLC31A2  | -0.79                                  | 0.004        | * | -0.60                                  | 0.012        | * | -0.17                                  | 0.577        | * | -0.52 | 0.040 | -0.66 | 0.002   | * | -0.42 | 0.051 | * |
| SMPL3A   | -1.11                                  | 0.009        | * | -1.12                                  | 0.002        | * | -0.56                                  | 0.149        | * | 0.49  | 0.040 | 0.74  | 0.000   | * | 0.49  | 0.013 | * |
| TREM1    | -0.72                                  | 0.009        | * | -0.67                                  | 0.005        | * | -0.28                                  | 0.287        | * | -0.52 | 0.040 | -0.66 | 0.002   | * | -0.42 | 0.051 | * |
| VNN1     | -0.97                                  | 0.030        | * | -1.17                                  | 0.002        | * | -0.35                                  | 0.423        | * | 0.49  | 0.040 | 0.74  | 0.000   | * | 0.49  | 0.013 | * |
| FLT1     | -1.01                                  | 0.028        | * | -0.                                    |              |   |                                        |              |   |       |       |       |         |   |       |       |   |

|               |       |       |       |       |       |       |        |       |       |       |       |       |       |
|---------------|-------|-------|-------|-------|-------|-------|--------|-------|-------|-------|-------|-------|-------|
| COMMD8        | -0.33 | 0.165 | -0.59 | 0.002 | -0.40 | 0.034 | VNN2   | -0.47 | 0.086 | -0.60 | 0.008 | -0.41 | 0.074 |
| CPD           | 0.52  | 0.055 | 0.46  | 0.043 | 0.64  | 0.004 | WBP5   | 0.25  | 0.205 | -0.42 | 0.020 | -0.70 | 0.238 |
| CYSR1         | -0.25 | 0.227 | -0.51 | 0.011 | -0.72 | 0.000 | WPT    | 0.78  | 0.061 | 0.78  | 0.026 | 0.57  | 0.108 |
| DUSP6         | -0.45 | 0.129 | -0.61 | 0.013 | -0.48 | 0.049 | ZDHHC3 | 0.56  | 0.095 | 0.73  | 0.008 | 0.30  | 0.328 |
| ENY2          | -0.45 | 0.067 | -0.46 | 0.026 | -0.59 | 0.004 | ZHR1   | 0.58  | 0.161 | 0.78  | 0.019 | 0.36  | 0.333 |
| FCER1G        | -0.45 | 0.165 | -0.75 | 0.004 | -0.51 | 0.049 | ZNF589 | 0.27  | 0.504 | 0.73  | 0.012 | 0.25  | 0.474 |
| FRMD8         | 0.52  | 0.053 | 0.72  | 0.001 | 0.49  | 0.028 | ZNF71  | 0.11  | 0.101 | 0.65  | 0.020 | 0.23  | 0.487 |
| GR            | 0.43  | 0.086 | 0.71  | 0.001 | 0.50  | 0.014 | ZNF792 | 0.70  | 0.108 | 0.95  | 0.008 | 0.67  | 0.673 |
| KIF1B         | 0.45  | 0.092 | 0.59  | 0.007 | 0.57  | 0.008 | ZNF800 | 0.27  | 0.108 | 0.95  | 0.008 | 0.67  | 0.673 |
| KIF2D         | 0.53  | 0.103 | 0.60  | 0.028 | 0.57  | 0.035 | ZNF801 | 0.27  | 0.108 | 0.95  | 0.008 | 0.67  | 0.673 |
| MP11          | 0.38  | 0.220 | 0.58  | 0.020 | 0.75  | 0.002 | ZNF802 | 0.27  | 0.108 | 0.95  | 0.008 | 0.67  | 0.673 |
| MRP9          | -0.43 | 0.075 | -0.55 | 0.006 | -0.68 | 0.000 | ZNF803 | 0.27  | 0.108 | 0.95  | 0.008 | 0.67  | 0.673 |
| NDUF45        | -0.25 | 0.247 | -0.60 | 0.000 | -0.36 | 0.037 | ZNF804 | 0.27  | 0.108 | 0.95  | 0.008 | 0.67  | 0.673 |
| NDUF87        | -0.37 | 0.213 | -0.49 | 0.043 | -0.62 | 0.007 | ZNF805 | 0.27  | 0.108 | 0.95  | 0.008 | 0.67  | 0.673 |
| NUP153        | 0.34  | 0.228 | 0.57  | 0.009 | 0.62  | 0.005 | ZNF806 | 0.27  | 0.108 | 0.95  | 0.008 | 0.67  | 0.673 |
| SD004         | -0.41 | 0.120 | -0.54 | 0.014 | -0.82 | 0.000 | ZNF807 | 0.27  | 0.108 | 0.95  | 0.008 | 0.67  | 0.673 |
| SD008         | -0.38 | 0.266 | -0.56 | 0.043 | -0.77 | 0.004 | ZNF808 | 0.27  | 0.108 | 0.95  | 0.008 | 0.67  | 0.673 |
| SEIPN1A1      | -0.46 | 0.067 | -0.69 | 0.001 | -0.47 | 0.021 | ZNF809 | 0.27  | 0.108 | 0.95  | 0.008 | 0.67  | 0.673 |
| SLC17A5       | -0.33 | 0.173 | -0.51 | 0.010 | -0.72 | 0.000 | ZNF810 | 0.27  | 0.108 | 0.95  | 0.008 | 0.67  | 0.673 |
| SLC7A7        | -0.47 | 0.076 | -0.68 | 0.002 | -0.52 | 0.016 | ZNF811 | 0.27  | 0.108 | 0.95  | 0.008 | 0.67  | 0.673 |
| SNRK-AS1      | 0.59  | 0.079 | 0.57  | 0.042 | 0.59  | 0.031 | ZNF812 | 0.27  | 0.108 | 0.95  | 0.008 | 0.67  | 0.673 |
| STAT3A        | 0.34  | 0.166 | 0.66  | 0.001 | 0.49  | 0.012 | ZNF813 | 0.27  | 0.108 | 0.95  | 0.008 | 0.67  | 0.673 |
| TBXAS1        | -0.27 | 0.290 | -0.49 | 0.043 | -0.64 | 0.007 | ZNF814 | 0.27  | 0.108 | 0.95  | 0.008 | 0.67  | 0.673 |
| TFPI2         | -0.52 | 0.079 | -0.65 | 0.008 | -0.49 | 0.042 | ZNF815 | 0.27  | 0.108 | 0.95  | 0.008 | 0.67  | 0.673 |
| TMEM184B      | 0.22  | 0.545 | 0.63  | 0.013 | 0.55  | 0.027 | ZNF816 | 0.27  | 0.108 | 0.95  | 0.008 | 0.67  | 0.673 |
| TYROBP        | -0.35 | 0.212 | -0.56 | 0.012 | -0.84 | 0.000 | ZNF817 | 0.27  | 0.108 | 0.95  | 0.008 | 0.67  | 0.673 |
| USMG5         | -0.39 | 0.120 | -0.49 | 0.018 | -0.68 | 0.001 | ZNF818 | 0.27  | 0.108 | 0.95  | 0.008 | 0.67  | 0.673 |
| USP19         | 0.46  | 0.145 | 0.76  | 0.005 | 0.64  | 0.044 | ZNF819 | 0.27  | 0.108 | 0.95  | 0.008 | 0.67  | 0.673 |
| USP38         | 0.44  | 0.105 | 0.49  | 0.029 | 0.61  | 0.006 | ZNF820 | 0.27  | 0.108 | 0.95  | 0.008 | 0.67  | 0.673 |
| XYLT2         | 0.27  | 0.329 | 0.60  | 0.005 | 0.57  | 0.006 | ZNF821 | 0.27  | 0.108 | 0.95  | 0.008 | 0.67  | 0.673 |
| ACTR5         | 0.56  | 0.137 | 0.74  | 0.018 | 0.53  | 0.093 | ZNF822 | 0.27  | 0.108 | 0.95  | 0.008 | 0.67  | 0.673 |
| ADAMDEC1      | -0.88 | 0.095 | -1.24 | 0.004 | -0.63 | 0.176 | ZNF823 | 0.27  | 0.108 | 0.95  | 0.008 | 0.67  | 0.673 |
| ARHGAP18      | -0.55 | 0.086 | -0.63 | 0.021 | -0.51 | 0.080 | ZNF824 | 0.27  | 0.108 | 0.95  | 0.008 | 0.67  | 0.673 |
| AUH           | 1.01  | 0.101 | 1.14  | 0.026 | 0.67  | 0.223 | ZNF825 | 0.27  | 0.108 | 0.95  | 0.008 | 0.67  | 0.673 |
| BAG2          | 0.29  | 0.548 | 0.70  | 0.042 | 0.42  | 0.254 | ZNF826 | 0.27  | 0.108 | 0.95  | 0.008 | 0.67  | 0.673 |
| BAIAP2        | -0.44 | 0.367 | -0.82 | 0.031 | -0.32 | 0.474 | ZNF827 | 0.27  | 0.108 | 0.95  | 0.008 | 0.67  | 0.673 |
| BLOC1S3       | -0.54 | 0.180 | -0.71 | 0.029 | -0.37 | 0.290 | ZNF828 | 0.27  | 0.108 | 0.95  | 0.008 | 0.67  | 0.673 |
| C16orf54      | 0.40  | 0.128 | 0.52  | 0.008 | 0.30  | 0.177 | ZNF829 | 0.27  | 0.108 | 0.95  | 0.008 | 0.67  | 0.673 |
| C1orf216      | 0.25  | 0.669 | 0.82  | 0.042 | 0.55  | 0.193 | ZNF830 | 0.27  | 0.108 | 0.95  | 0.008 | 0.67  | 0.673 |
| C2orf49       | -0.47 | 0.455 | -0.97 | 0.040 | -0.44 | 0.407 | ZNF831 | 0.27  | 0.108 | 0.95  | 0.008 | 0.67  | 0.673 |
| C3orf58       | 0.46  | 0.128 | 0.60  | 0.032 | 0.43  | 0.144 | ZNF832 | 0.27  | 0.108 | 0.95  | 0.008 | 0.67  | 0.673 |
| CANX1D        | 0.47  | 0.282 | 0.64  | 0.040 | 0.48  | 0.136 | ZNF833 | 0.27  | 0.108 | 0.95  | 0.008 | 0.67  | 0.673 |
| CC12          | -0.33 | 0.522 | -0.86 | 0.019 | -0.52 | 0.186 | ZNF834 | 0.27  | 0.108 | 0.95  | 0.008 | 0.67  | 0.673 |
| CC17          | -0.48 | 0.282 | -0.80 | 0.010 | -0.36 | 0.355 | ZNF835 | 0.27  | 0.108 | 0.95  | 0.008 | 0.67  | 0.673 |
| CCR12         | -0.42 | 0.263 | -0.76 | 0.011 | -0.09 | 0.848 | ZNF836 | 0.27  | 0.108 | 0.95  | 0.008 | 0.67  | 0.673 |
| CD33          | -1.08 | 0.261 | -1.61 | 0.039 | -1.28 | 0.103 | ZNF837 | 0.27  | 0.108 | 0.95  | 0.008 | 0.67  | 0.673 |
| CD6           | -0.12 | 0.833 | 0.67  | 0.042 | 0.51  | 0.134 | ZNF838 | 0.27  | 0.108 | 0.95  | 0.008 | 0.67  | 0.673 |
| CD68          | -0.35 | 0.184 | -0.66 | 0.002 | -0.36 | 0.093 | ZNF839 | 0.27  | 0.108 | 0.95  | 0.008 | 0.67  | 0.673 |
| CDCA2EP2      | -0.30 | 0.490 | -0.66 | 0.037 | -0.08 | 0.864 | ZNF840 | 0.27  | 0.108 | 0.95  | 0.008 | 0.67  | 0.673 |
| CLEC4E        | -0.61 | 0.086 | -0.94 | 0.001 | -0.53 | 0.069 | ZNF841 | 0.27  | 0.108 | 0.95  | 0.008 | 0.67  | 0.673 |
| CLEC7A        | -0.35 | 0.521 | -0.83 | 0.034 | -0.51 | 0.223 | ZNF842 | 0.27  | 0.108 | 0.95  | 0.008 | 0.67  | 0.673 |
| CPM8          | -0.52 | 0.422 | -1.02 | 0.036 | -0.32 | 0.601 | ZNF843 | 0.27  | 0.108 | 0.95  | 0.008 | 0.67  | 0.673 |
| CSF3          | -0.52 | 0.359 | -0.83 | 0.030 | -0.51 | 0.160 | ZNF844 | 0.27  | 0.108 | 0.95  | 0.008 | 0.67  | 0.673 |
| CTSF          | 0.32  | 0.628 | 1.25  | 0.006 | 0.88  | 0.051 | ZNF845 | 0.27  | 0.108 | 0.95  | 0.008 | 0.67  | 0.673 |
| DAB2          | -0.62 | 0.089 | -0.67 | 0.029 | -0.49 | 0.119 | ZNF846 | 0.27  | 0.108 | 0.95  | 0.008 | 0.67  | 0.673 |
| DFNA5         | -0.63 | 0.080 | -0.89 | 0.002 | -0.33 | 0.311 | ZNF847 | 0.27  | 0.108 | 0.95  | 0.008 | 0.67  | 0.673 |
| EC11          | 0.62  | 0.167 | 0.78  | 0.031 | 0.45  | 0.249 | ZNF848 | 0.27  | 0.108 | 0.95  | 0.008 | 0.67  | 0.673 |
| ELAVL1        | 0.43  | 0.120 | 0.74  | 0.013 | 0.51  | 0.091 | ZNF849 | 0.27  | 0.108 | 0.95  | 0.008 | 0.67  | 0.673 |
| ERD11         | -0.52 | 0.086 | -0.85 | 0.001 | -0.31 | 0.252 | ZNF850 | 0.27  | 0.108 | 0.95  | 0.008 | 0.67  | 0.673 |
| EXOSC4        | -0.51 | 0.130 | -0.69 | 0.013 | -0.23 | 0.491 | ZNF851 | 0.27  | 0.108 | 0.95  | 0.008 | 0.67  | 0.673 |
| FAM105A       | 0.50  | 0.080 | 0.76  | 0.001 | 0.44  | 0.064 | ZNF852 | 0.27  | 0.108 | 0.95  | 0.008 | 0.67  | 0.673 |
| FAM83G        | 0.39  | 0.431 | 0.82  | 0.029 | 0.71  | 0.055 | ZNF853 | 0.27  | 0.108 | 0.95  | 0.008 | 0.67  | 0.673 |
| FCAR          | -0.52 | 0.280 | -0.91 | 0.002 | -0.31 | 0.211 | ZNF854 | 0.27  | 0.108 | 0.95  | 0.008 | 0.67  | 0.673 |
| FCR           | -0.41 | 0.067 | -0.67 | 0.000 | -0.27 | 0.169 | ZNF855 | 0.27  | 0.108 | 0.95  | 0.008 | 0.67  | 0.673 |
| HL3           | 0.57  | 0.180 | 0.72  | 0.035 | 0.24  | 0.572 | ZNF856 | 0.27  | 0.108 | 0.95  | 0.008 | 0.67  | 0.673 |
| KFBP8         | 0.39  | 0.166 | 0.68  | 0.002 | 0.28  | 0.250 | ZNF857 | 0.27  | 0.108 | 0.95  | 0.008 | 0.67  | 0.673 |
| FL11          | 0.63  | 0.053 | 1.03  | 0.000 | 0.51  | 0.065 | ZNF858 | 0.27  | 0.108 | 0.95  | 0.008 | 0.67  | 0.673 |
| FRS2          | -0.36 | 0.529 | -0.88 | 0.002 | -0.11 | 0.807 | ZNF859 | 0.27  | 0.108 | 0.95  | 0.008 | 0.67  | 0.673 |
| GSD2          | -0.40 | 0.231 | -0.65 | 0.015 | -0.02 | 0.973 | ZNF860 | 0.27  | 0.108 | 0.95  | 0.008 | 0.67  | 0.673 |
| GMIN2         | -0.13 | 0.855 | -0.85 | 0.041 | -0.38 | 0.420 | ZNF861 | 0.27  | 0.108 | 0.95  | 0.008 | 0.67  | 0.673 |
| GGH           | -0.45 | 0.302 | -0.73 | 0.034 | -0.59 | 0.091 | ZNF862 | 0.27  | 0.108 | 0.95  | 0.008 | 0.67  | 0.673 |
| GIMAP1        | 0.39  | 0.266 | 0.69  | 0.012 | 0.47  | 0.097 | ZNF863 | 0.27  | 0.108 | 0.95  | 0.008 | 0.67  | 0.673 |
| GIMAP1-GIMAP5 | 1.89  | 0.075 | 1.77  | 0.047 | 0.85  | 0.331 | ZNF864 | 0.27  | 0.108 | 0.95  | 0.008 | 0.67  | 0.673 |
| GN10          | -0.30 | 0.280 | -0.61 | 0.005 | -0.10 | 0.752 | ZNF865 | 0.27  | 0.108 | 0.95  | 0.008 | 0.67  | 0.673 |
| GPR137B       | -0.51 | 0.376 | -0.90 | 0.044 | -0.31 | 0.566 | ZNF866 | 0.27  | 0.108 | 0.95  | 0.008 | 0.67  | 0.673 |
| GPR35         | -0.41 | 0.322 | -0.70 | 0.031 | -0.12 | 0.791 | ZNF867 | 0.27  | 0.108 | 0.95  | 0.008 | 0.67  | 0.673 |
| GPR84         | -0.38 | 0.154 | -0.68 | 0.002 | 0.05  | 0.891 | ZNF868 | 0.27  | 0.108 | 0.95  | 0.008 | 0.67  | 0.673 |
| GTF2I         | 0.85  | 0.101 | 1.11  | 0.009 | 0.75  | 0.082 | ZNF869 | 0.27  | 0.108 | 0.95  | 0.008 | 0.67  | 0.673 |
| GZMMA         | 0.55  | 0.059 | 0.77  | 0.019 | 0.31  | 0.448 | ZNF870 | 0.27  | 0.108 | 0.95  | 0.008 | 0.67  | 0.673 |
| HBEFG         | -0.57 | 0.080 | -0.76 | 0.004 | -0.02 | 0.970 | ZNF871 | 0.27  | 0.108 | 0.95  | 0.008 | 0.67  | 0.673 |
| HECTD3        | 0.61  | 0.107 | 0.66  | 0.038 | 0.38  | 0.267 | ZNF872 | 0.27  | 0.108 | 0.95  | 0.008 | 0.67  | 0.673 |
| HLC5          | 0.46  | 0.310 | 0.80  | 0.024 | 0.59  | 0.105 | ZNF873 | 0.27  | 0.108 | 0.95  | 0.008 | 0.67  | 0.673 |
| HPF01         | -0.50 | 0.145 | -0.61 | 0.052 | -0.23 | 0.487 | ZNF874 | 0.27  | 0.108 | 0.95  | 0.008 | 0.67  | 0.673 |
| HS6           | -0.65 | 0.058 | -0.85 | 0.003 | -0.23 | 0.602 | ZNF875 | 0.27  | 0.108 | 0.95  | 0.008 | 0.67  | 0.673 |
| IL19          | -0.62 | 0.543 | -1.15 | 0.033 | -0.56 | 0.516 | ZNF876 | 0.27  | 0.108 | 0.95  | 0.008 | 0.67  | 0.673 |
| IL1R2         | -0.38 | 0.627 | -1.20 | 0.025 | -0.63 | 0.285 | ZNF877 | 0.27  | 0.108 | 0.95  | 0.008 | 0.67  | 0.673 |
| IL24          | -0.86 | 0.053 | -0.92 | 0.013 | -0.51 | 0.201 | ZNF878 | 0.27  | 0.108 | 0.95  | 0.008 | 0.67  | 0.673 |
| IL8           | -0.48 | 0.196 | -0.68 | 0.012 | -0.14 | 0.701 | ZNF879 | 0.27  | 0.108 | 0.95  | 0.008 | 0.67  | 0.673 |
| ILY1-AS1      | -0.50 | 0.263 | -0.76 | 0.035 | -0.26 | 0.542 | ZNF880 | 0.27  | 0.108 | 0.95  | 0.008 | 0.67  | 0.673 |
| ISF3-RAB43    | 0.18  | 0.841 | -1.07 | 0.033 | 0.24  | 0.717 | ZNF881 | 0.27  | 0.108 | 0.95  | 0.008 | 0.67  | 0.673 |
| ITB           | 0.24  | 0.621 | 0.73  | 0.030 | 0.33  | 0.372 | ZNF882 |       |       |       |       |       |       |

**Supplementary Table 2: List of genes significantly (FDR 5%) and differentially (fold-change > 2) expressed after incubation of human PBMCs (n=7) with IL-7 compared to unstimulated cells.**

| Gene ID  | logFC /Unstim | adj.P.Val | Gene ID      | logFC /Unstim | adj.P.Val |
|----------|---------------|-----------|--------------|---------------|-----------|
| CISH     | 3,24          | 1,8E-16   | NOG          | -1,92         | 1,4E-03   |
| SOCS2    | 2,91          | 7,8E-12   | MAP3K14-AS1  | -1,74         | 1,4E-02   |
| MEOX1    | 2,56          | 2,5E-07   | S100B        | -1,61         | 1,6E-02   |
| DPP4     | 2,42          | 1,1E-14   | PASK         | -1,55         | 1,9E-15   |
| BCL2     | 2,28          | 3,4E-10   | TSC22D3      | -1,52         | 1,2E-15   |
| TAF4B    | 2,27          | 9,9E-13   | TCF7         | -1,43         | 3,2E-12   |
| FRMD4B   | 1,96          | 5,4E-08   | HPCAL4       | -1,38         | 1,5E-04   |
| AFAP1    | 1,87          | 4,1E-08   | GIMAP2       | -1,34         | 1,1E-12   |
| PTGER2   | 1,85          | 1,5E-12   | AVPI1        | -1,32         | 2,7E-03   |
| IGFBP3   | 1,84          | 9,3E-07   | PF4          | -1,32         | 2,3E-02   |
| IRF4     | 1,82          | 5,6E-12   | FAM102A      | -1,13         | 2,1E-09   |
| IFNG     | 1,66          | 1,4E-03   | CBR3         | -1,12         | 1,4E-03   |
| AHR      | 1,64          | 2,3E-07   | GPA33        | -1,11         | 1,4E-03   |
| DNLZ     | 1,63          | 1,2E-04   | PHF19        | -1,11         | 1,4E-03   |
| CMAHP    | 1,57          | 2,8E-08   | ZCCHC18      | -1,10         | 3,7E-02   |
| ALDH16A1 | 1,54          | 2,5E-04   | IL7R         | -1,10         | 1,4E-09   |
| TXK      | 1,46          | 8,3E-08   | CD27         | -1,09         | 1,4E-09   |
| ADAM19   | 1,46          | 5,8E-11   | AQP3         | -1,08         | 1,6E-04   |
| RGS1     | 1,44          | 4,3E-09   | SNHG7        | -1,08         | 3,7E-02   |
| PSMD3    | 1,44          | 1,8E-04   | LOC100507206 | -1,07         | 4,7E-02   |
| CDK6     | 1,44          | 4,7E-07   | TMEM204      | -1,06         | 3,4E-10   |
| PDE4B    | 1,43          | 1,2E-11   | FAIM3        | -1,03         | 4,4E-11   |
| LTA      | 1,42          | 2,8E-06   | NCAPH        | -1,02         | 3,4E-04   |
| MB21D2   | 1,39          | 1,2E-06   | LY9          | -1,01         | 6,6E-08   |
| BHLHE40  | 1,39          | 2,5E-07   | SELL         | -1,00         | 6,4E-13   |
| TNFRSF4  | 1,38          | 1,2E-03   |              |               |           |
| SOS1     | 1,37          | 6,1E-09   |              |               |           |
| ETS1     | 1,37          | 5,2E-05   |              |               |           |
| FAM101B  | 1,36          | 4,7E-06   |              |               |           |
| FAM13A   | 1,30          | 2,7E-04   |              |               |           |
| TAF10    | 1,29          | 4,9E-03   |              |               |           |
| CCR2     | 1,29          | 3,3E-05   |              |               |           |
| AP3M2    | 1,28          | 3,1E-09   |              |               |           |
| DDRKG1   | 1,28          | 7,0E-03   |              |               |           |
| DOHH     | 1,26          | 4,9E-02   |              |               |           |
| IKZF4    | 1,26          | 3,8E-05   |              |               |           |
| SLC4A10  | 1,26          | 5,9E-05   |              |               |           |
| KLC2     | 1,23          | 3,6E-03   |              |               |           |
| COTL1    | 1,23          | 2,9E-04   |              |               |           |
| CYLD     | 1,21          | 6,4E-13   |              |               |           |
| SYNE3    | 1,19          | 9,6E-04   |              |               |           |
| DUSP2    | 1,19          | 1,4E-02   |              |               |           |
| CD8B     | 1,17          | 1,5E-09   |              |               |           |
| ITGA4    | 1,16          | 1,2E-11   |              |               |           |
| ST3GAL5  | 1,15          | 2,8E-02   |              |               |           |
| IL2RA    | 1,15          | 1,8E-07   |              |               |           |
| GNPDA1   | 1,15          | 2,8E-09   |              |               |           |
| CCR5     | 1,15          | 2,1E-04   |              |               |           |
| MAF1     | 1,14          | 2,0E-02   |              |               |           |
| SLC37A3  | 1,14          | 1,7E-04   |              |               |           |
| SPINT1   | 1,14          | 1,8E-02   |              |               |           |
| FKBP5    | 1,14          | 2,7E-07   |              |               |           |
| DDI2     | 1,13          | 2,9E-03   |              |               |           |
| HSBP1L1  | 1,12          | 3,8E-03   |              |               |           |
| MTA2     | 1,12          | 5,8E-04   |              |               |           |
| UGCG     | 1,10          | 2,2E-03   |              |               |           |
| TLR1     | 1,10          | 5,2E-05   |              |               |           |
| C17orf59 | 1,07          | 1,4E-02   |              |               |           |
| RNF149   | 1,07          | 5,3E-05   |              |               |           |
| GNA15    | 1,07          | 7,9E-04   |              |               |           |
| POLRMT   | 1,06          | 5,3E-05   |              |               |           |
| HSPA1L   | 1,06          | 4,2E-03   |              |               |           |
| CMTM6    | 1,04          | 7,3E-13   |              |               |           |
| TRPC4AP  | 1,03          | 2,9E-04   |              |               |           |
| PITRM1   | 1,03          | 2,5E-07   |              |               |           |
| B3GNT2   | 1,03          | 1,1E-02   |              |               |           |
| KLF7     | 1,02          | 5,7E-05   |              |               |           |
| TAZ      | 1,01          | 3,2E-02   |              |               |           |
